# Supplementary material for: Pre-Processing a Polymer Blend into a Polymer Alloy by KinetiSol Enables Increased Ivacaftor Amorphous Solid Dispersion Drug Loading and Dissolution
Source: MDPI journal article supplement (doi:10.3390/biomedicines11051281), 2023-04-26
Supplement: s1 [file s1]

## 1. Supplemental Information

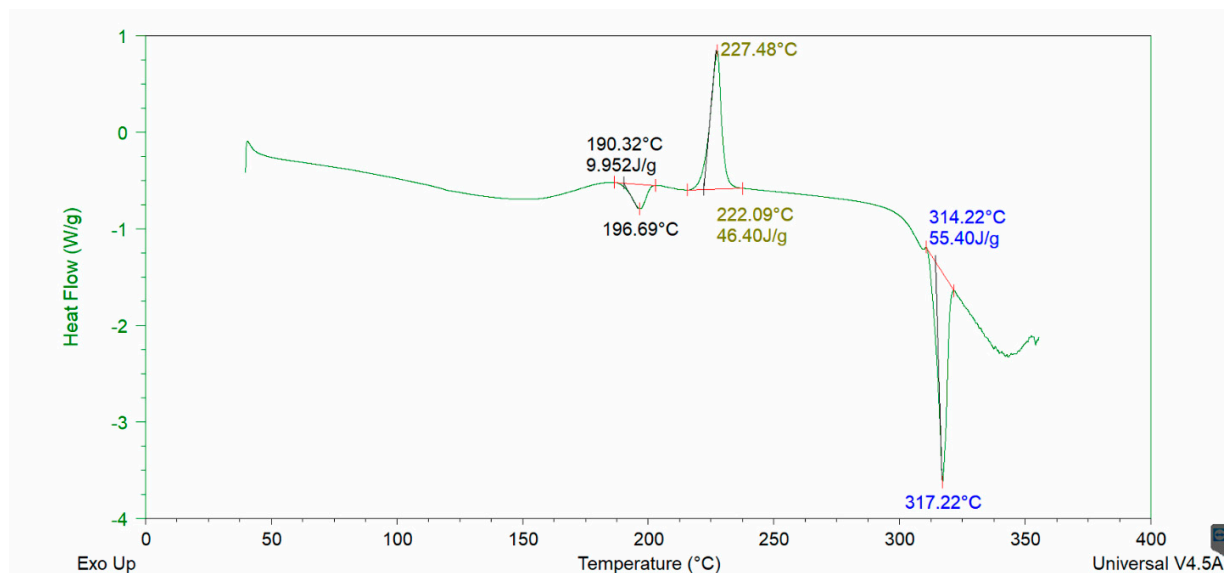

Supplemental Figure S1: mDSC of pure IVA showing two endothermic events: one event at 196.7 °C and one event associated with the melting of IVA at 317.2 °C, as well as one exothermic event at 227.5 °C that is potentially associated with a polymorph change.

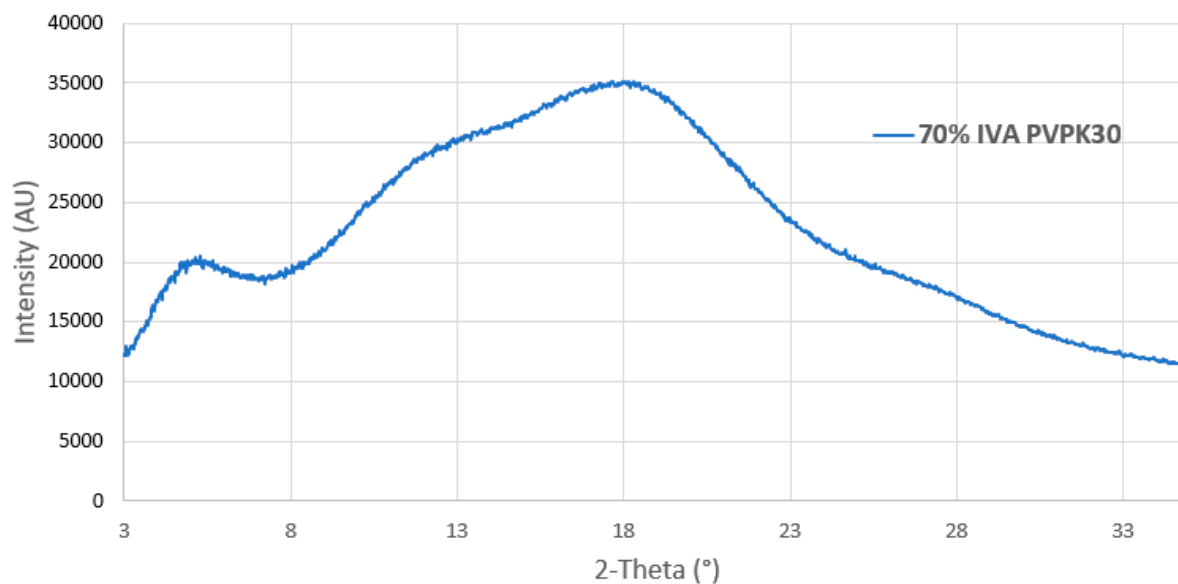

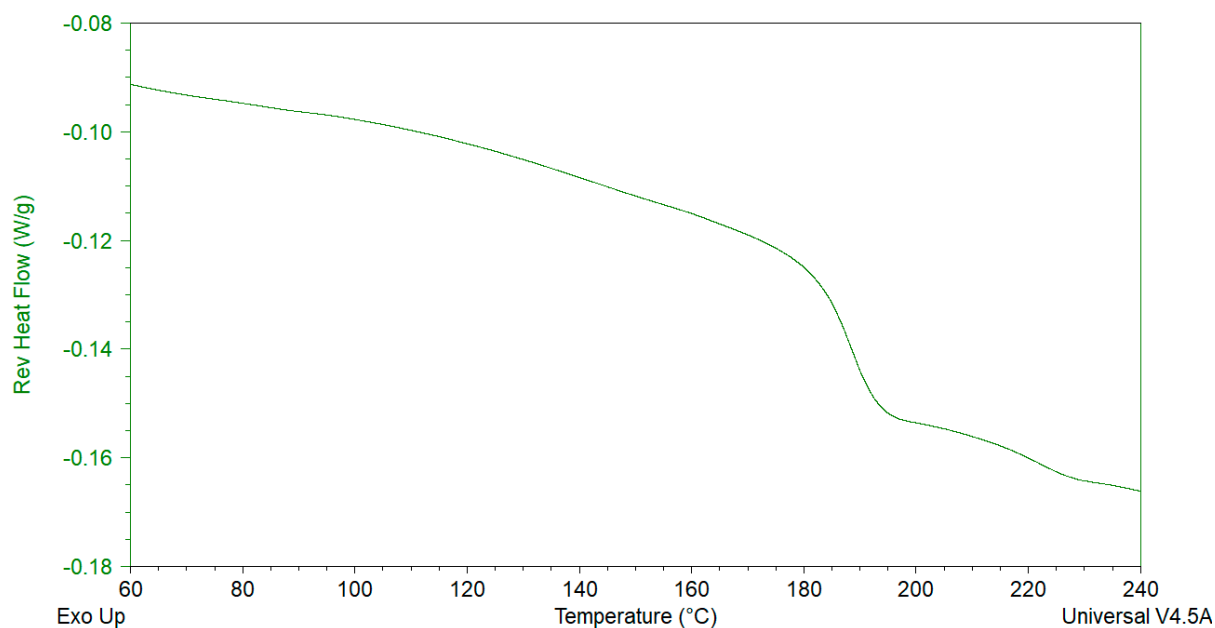

Supplemental Figure S2. PXRD and mDSC of 70% IVA PVPK30 ASD prepared by KinetiSol using PVPK30 that had been pre-processed, milled, and sieved to have a particle size range of 500  $\mu\text{m}$  -1200  $\mu\text{m}$ .

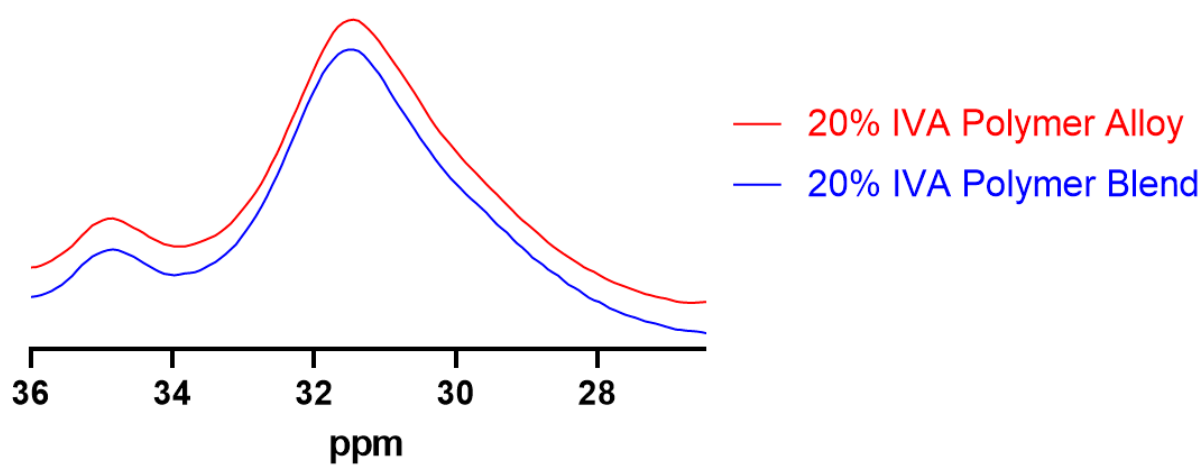

Supplemental Figure S3:  $^{13}\text{C}$  ssNMR of 20% IVA polymer alloy and 20% IVA polymer blend ASDs. It should be noted that the peak at 31.44 ppm is comprised of overlapping carbons from PVP (backbone methylene carbon) and IVA (methyl carbons of tert-butyl groups). Units are arbitrary and spectra are overlaid for visual clarity.

Supplemental Table S1: Compositions of tablets containing 150 mg IVA used in dissolution studies.

| ASD Drug Load                              | 20% IVA | 40% IVA | 80% IVA  |
|--------------------------------------------|---------|---------|----------|
| Percent w/w ASD                            | 60%     |         |          |
| Mass of ASD per 150 mg dose                | 750 mg  | 375 mg  | 187.5 mg |
| Mass NaCl (10%)                            | 125 mg  | 62.5 mg | 31.25 mg |
| Mass Na <sub>2</sub> SO <sub>4</sub> (10%) | 125 mg  | 62.5 mg | 31.25 mg |
| Mass Microcrystalline Cellulose (10%)      | 125 mg  | 62.5 mg | 31.25 mg |
| Mass croscarmellose                        | 120 mg  | 60 mg   | 30 mg    |
| Mass SLS                                   | 5 mg    | 2.5 mg  | 1 mg     |
| Total tablet mass                          | 1250 mg | 625 mg  | 312.5 mg |
